# Supplementary material for: Rapamycin and trametinib: a rational combination for treatment of NSCLC
Source: PubMed Central journal article supplement (PMC8375233; doi:10.7150/ijbs.62752), 2021-07-25
Supplement: ijbsv17p3211s1.pdf [file ijbsv17p3211s1.pdf]

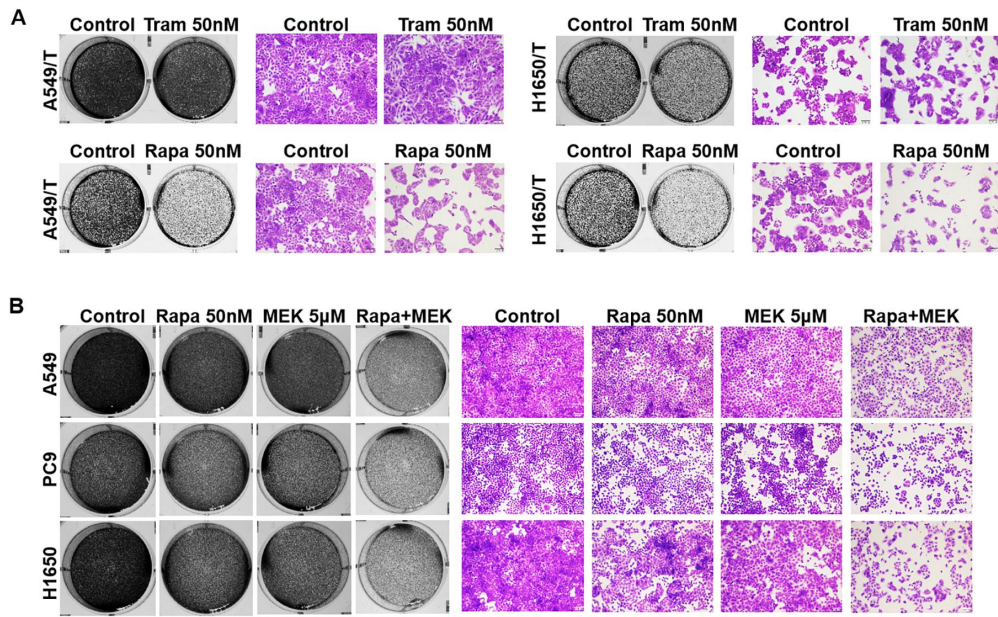

Supplementary figure. 1

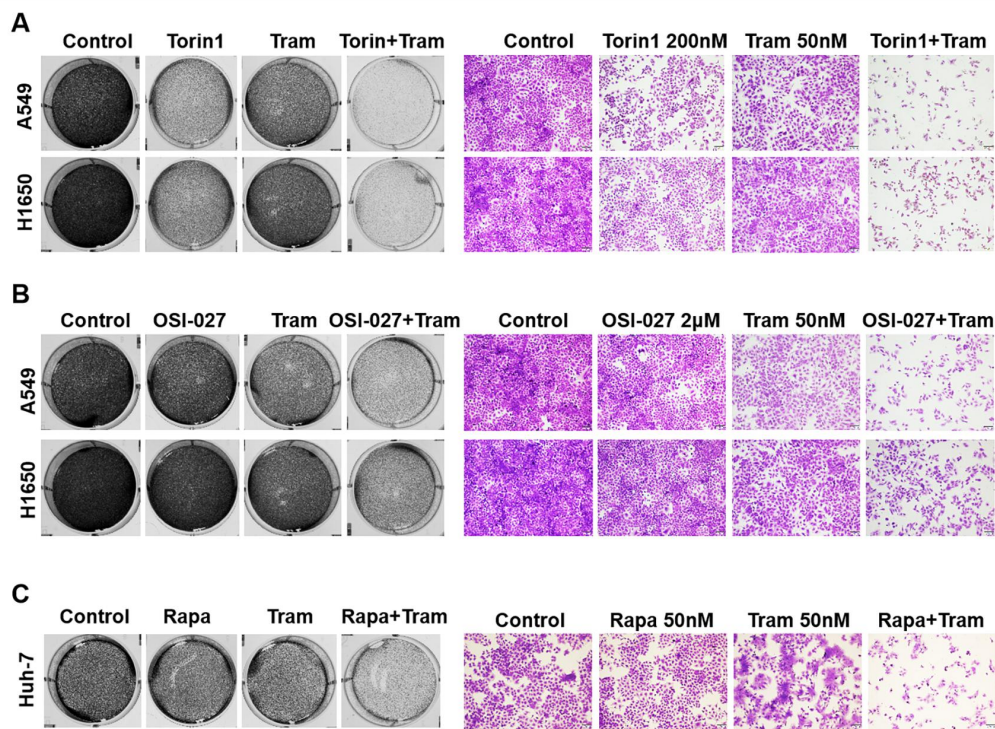

Supplementary figure. 2
